# Supplementary material for: The Tissue-Specific Rep8/UBXD6 Tethers p97 to the Endoplasmic Reticulum Membrane for Degradation of Misfolded Proteins
Source: PubMed Central journal article supplement (PMC3174242; doi:10.1371/journal.pone.0025061), 2011-09-15
Supplement: pone.0025061.s004.pdf [file pone.0025061.s004.pdf]

**Table S1**  
*Sequences of primers used for qRT-PCR*

| <b>Gene</b>    | <b>Primer Sequence</b>          |
|----------------|---------------------------------|
| <i>β-Actin</i> | 5' - GGCTGTATTCCCCTCCATCG -3'   |
|                | 5' - ACATGGCATTGTTACCAACTGG -3' |
| <i>Sdmg1</i>   | 5' - TCTGTGTTGAGATGCTGTTTCG -3' |
|                | 5' - AGGCTGGCGAGAAGTTATGA -3'   |
| <i>Stra8</i>   | 5' - CTATGTTTGCCACCTGCAAC -3'   |
|                | 5' - AAAGGTCTCCAGGCACTTCA -3'   |
| <i>Sycp3</i>   | 5' - TGCTGCTGAGTTTCCATCAT -3'   |
|                | 5' - GCAATGAAACAGATACACGAGC -3' |
| <i>Prm1</i>    | 5' - CCTTATGGTGTATGAGCGGC -3'   |
|                | 5' - ACCATGGCCAGATACCGAT -3'    |
| <i>Rep8</i>    | 5' - CAGATGACAGGGGAGACCTG -3'   |
|                | 5' - TTGCTGCCTCTCCGTTTATT -3'   |
